# Supplementary material for: Structural organization of surfactant aggregates in vacuo: a molecular dynamics and well-tempered metadynamics study
Source: Royal Society of Chemistry journal article supplement (doi:10.1039/c5cp01926e), 2015-01-01
Supplement: c5cp01926e1.pdf [file c5cp01926e1.pdf]

SUPPORTING INFORMATION

**Structural organization of surfactant aggregates in vacuo. A molecular dynamics and well-tempered metadynamics study**

Giovanna Longhi, Sandro L. Fornili, Vincenzo Turco Liveri

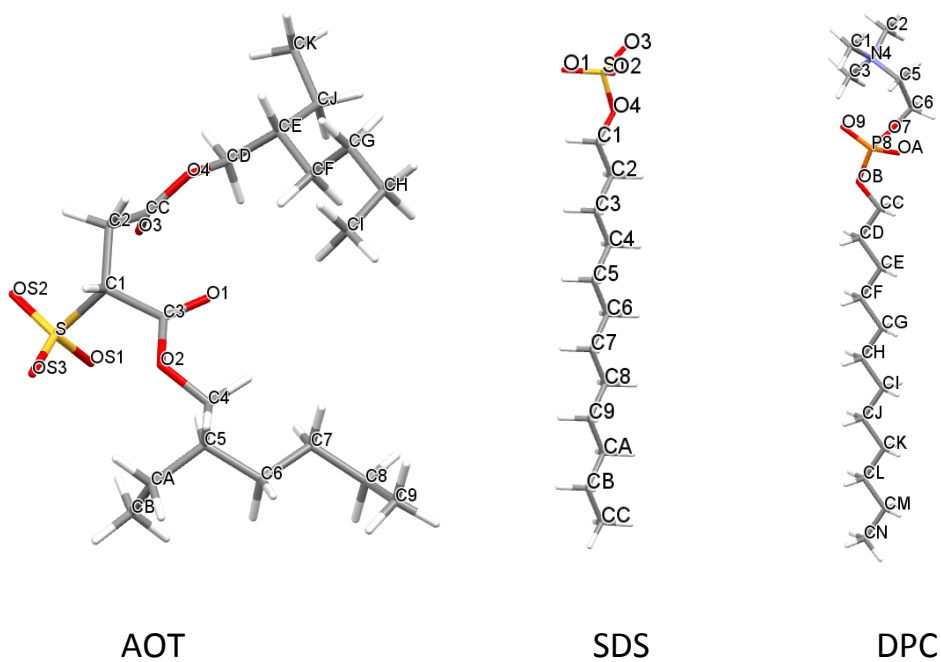

Figure 1-SI Molecular structures and atomic labels of surfactants.

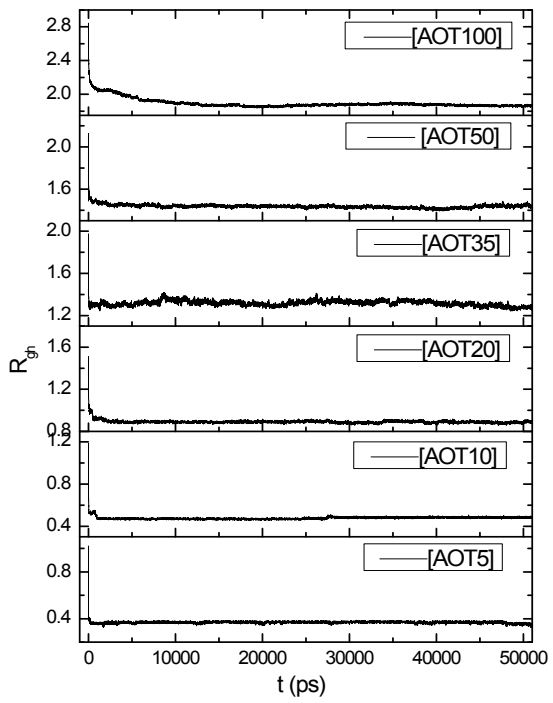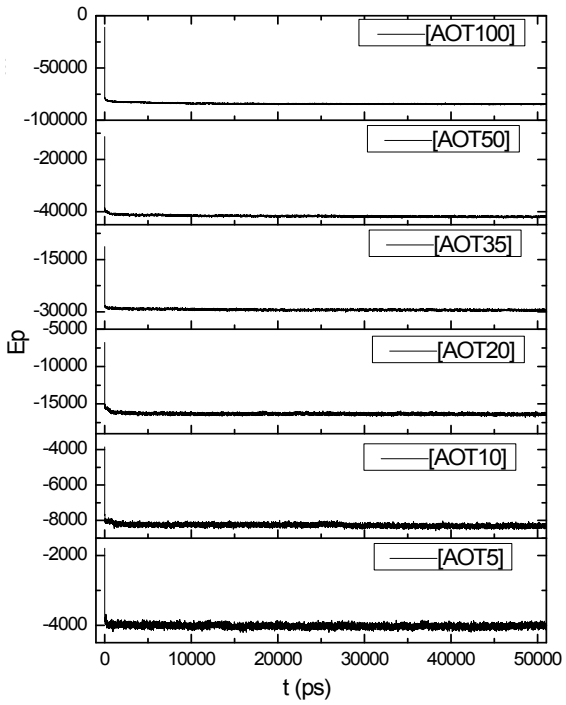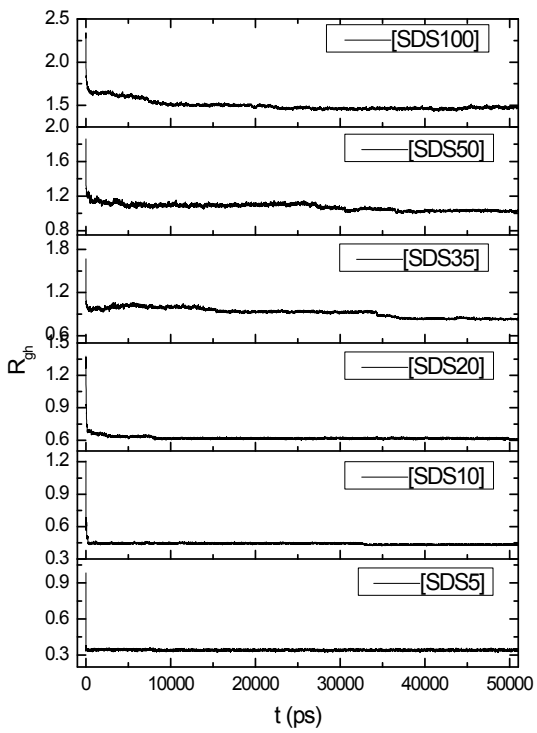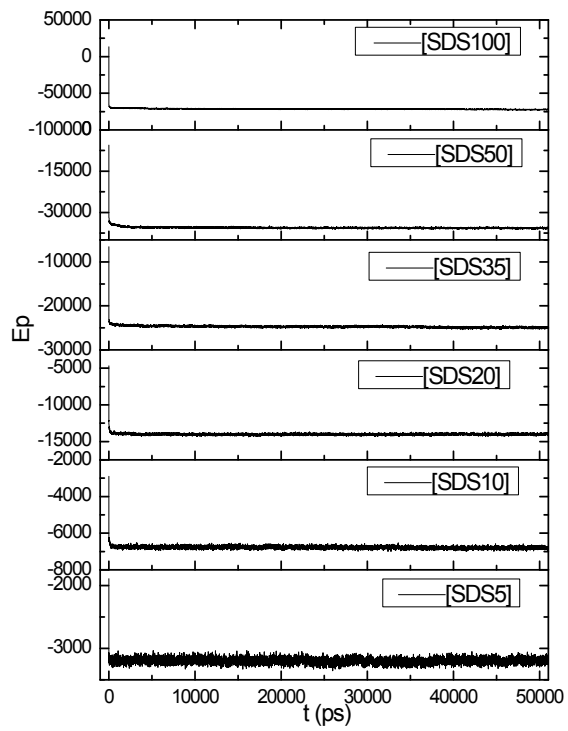

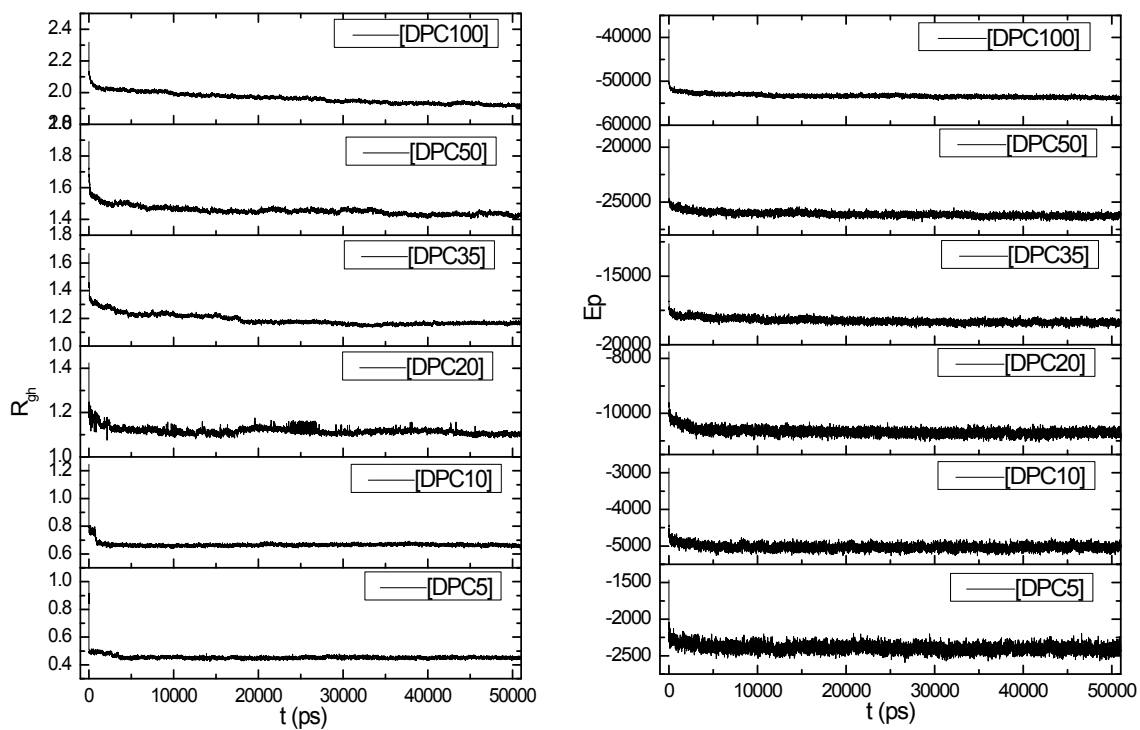

Figure 2-SI Gyration radius  $R_{gh}$  of the pivot atoms of the surfactant head group (S for AOT and SDS, and P for DPC, left panel) and aggregate potential energy ( $E_p$ ) as a function of the simulation time.

[AOT5] t=0 ns

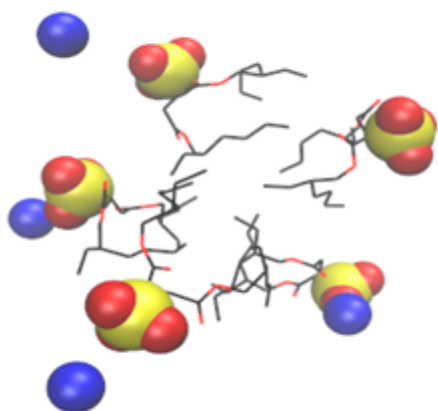

[AOT5] t=50ns

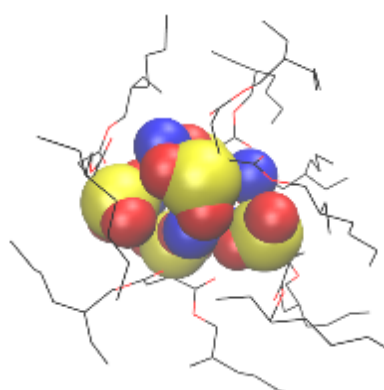

[AOT10] t=0 ns

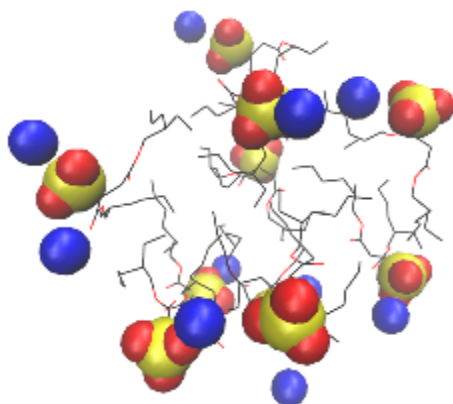

[AOT10] t=50 ns

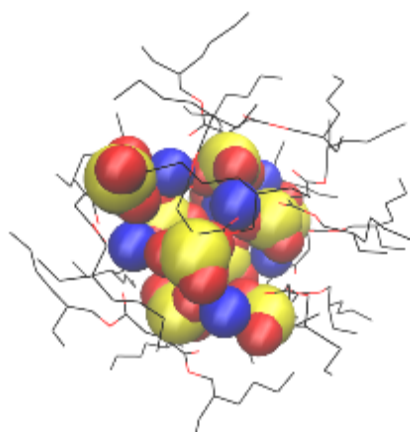

[AOT20] t=0 ns

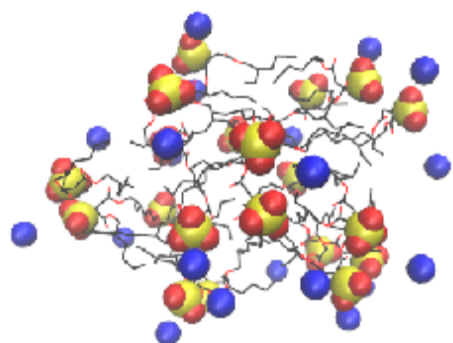

[AOT20] t=50 ns

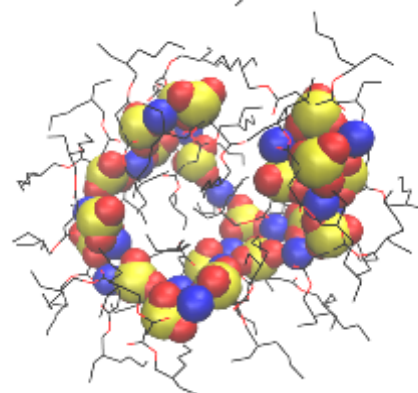

[AOT35] t=0 ns

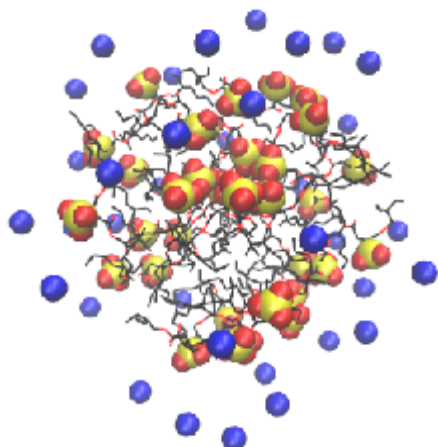

[AOT35] t=50 ns

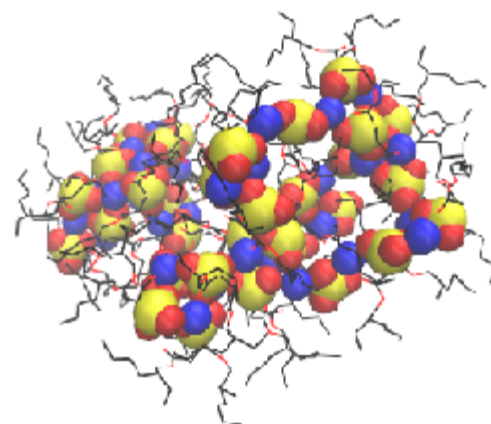

[AOT50] t=0 ns

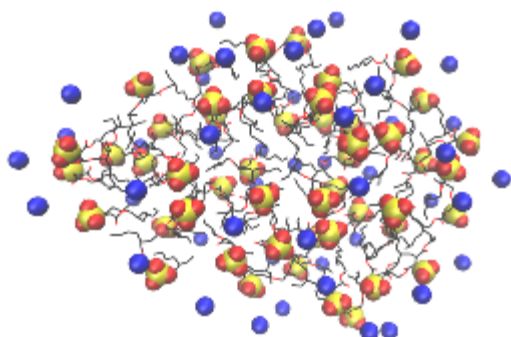

[AOT50] t=50 ns

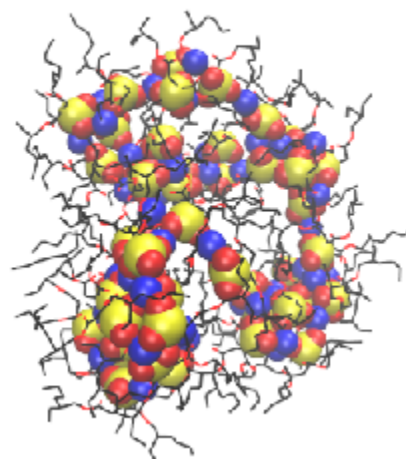

[AOT100] t=0ns

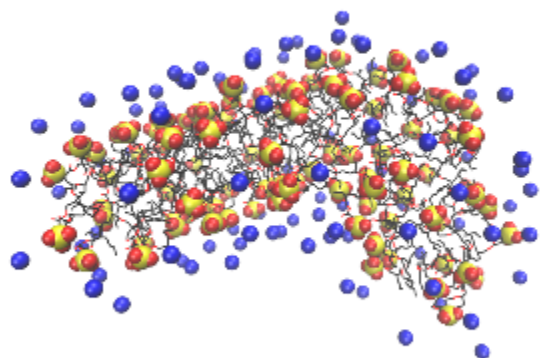

[AOT100] t=50ns

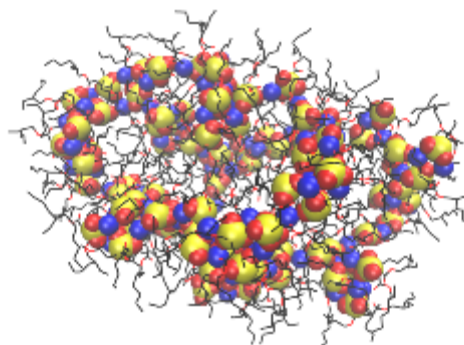

[SDS5] t=0 ns

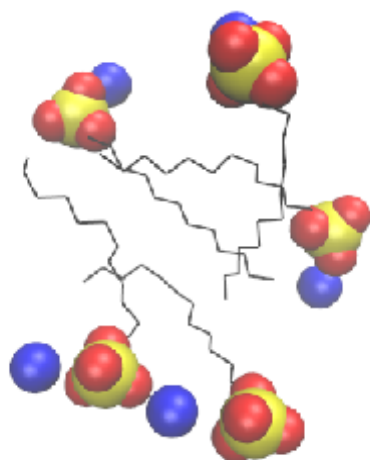

[SDS5] t=50 ns

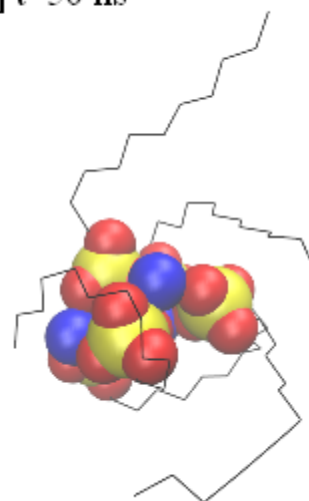

[SDS10] t=0 ns

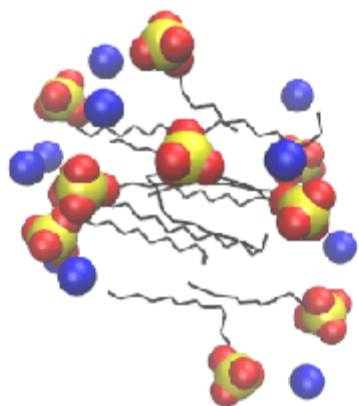

[SDS10] t=50 ns

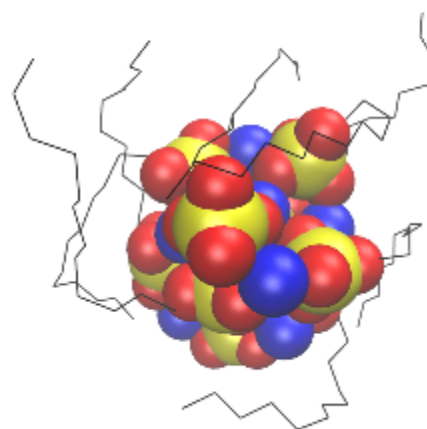

[SDS20] t=0 ns

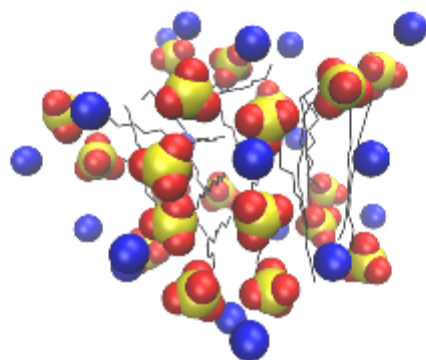

[SDS20] t=50 ns

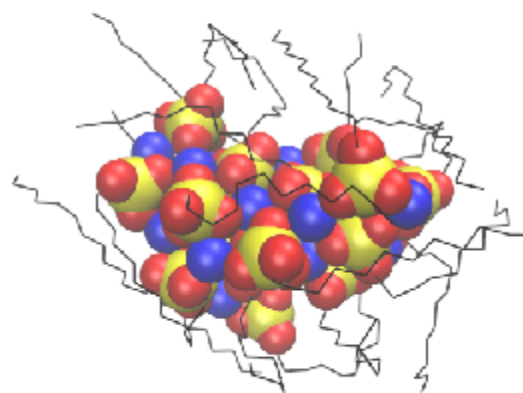

[SDS35] t=0 ns

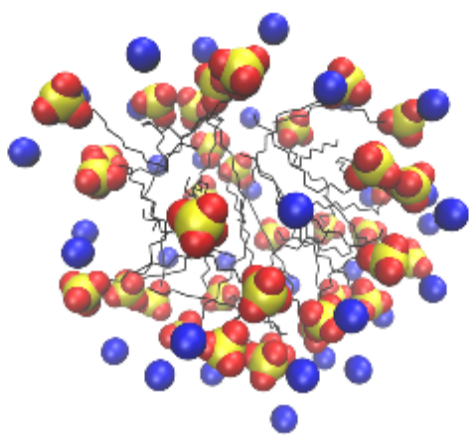

[SDS35] t=50 ns

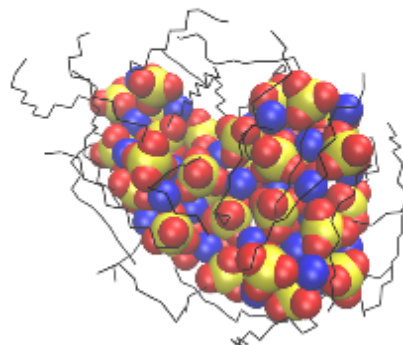

[SDS50] t= 0 ns

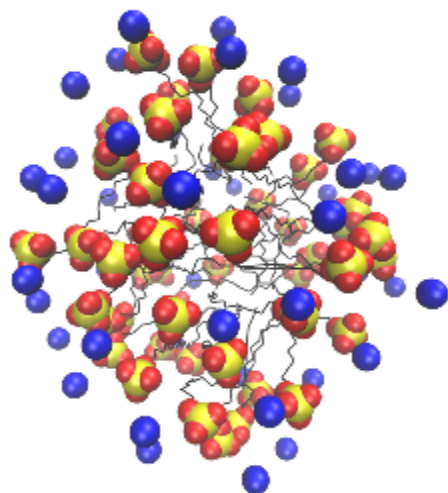

[SDS50] t=50 ns

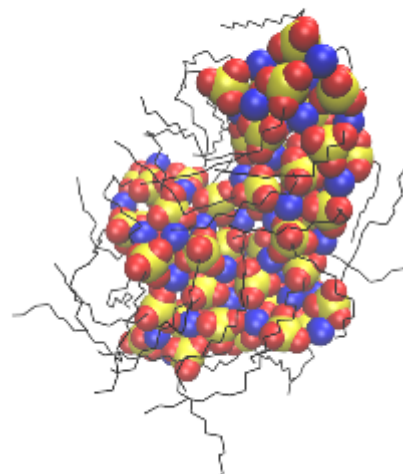

[SDS100] t=0 ns

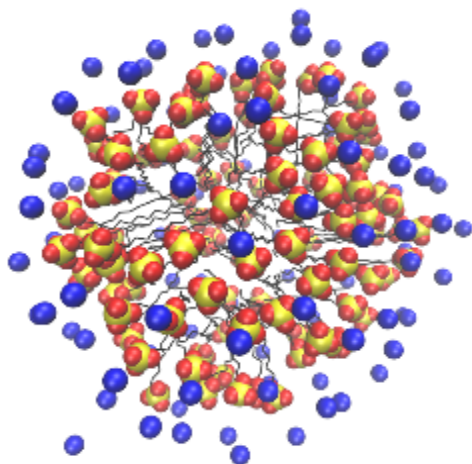

[SDS100] t=50 ns

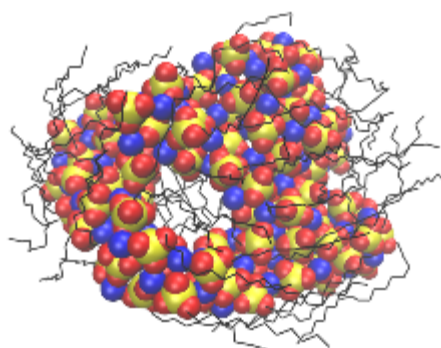

[DPC5] t=0 ns

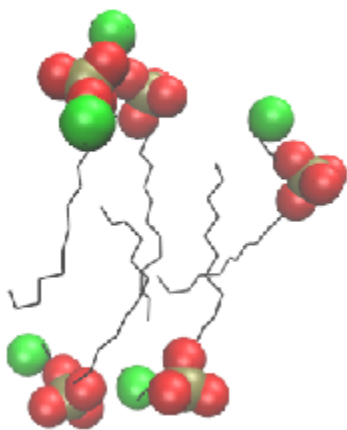

[DPC5] t=50 ns

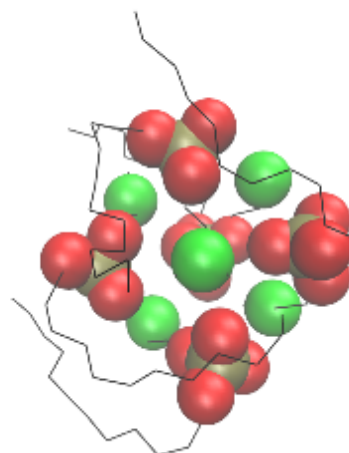

[DPC10] t=0 ns

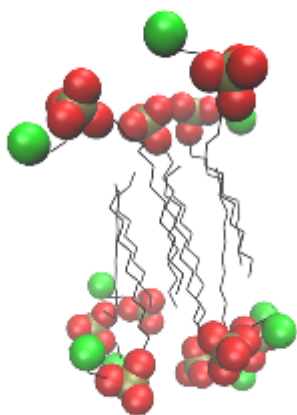

[DPC10] t=50 ns

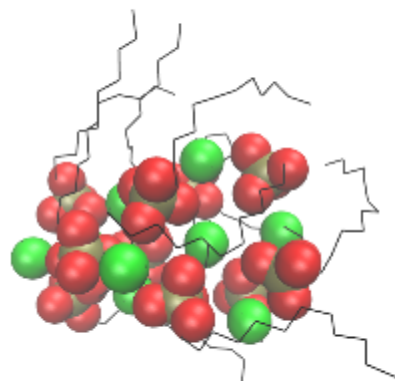

[DPC20] t=0 ns

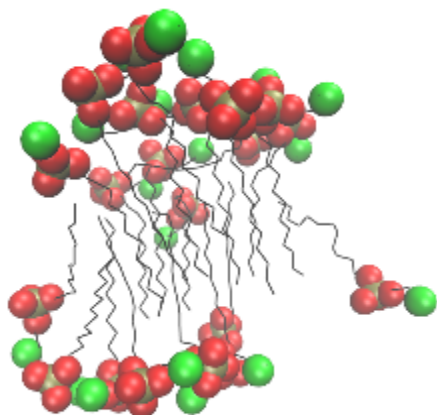

[DPC20] t=50 ns

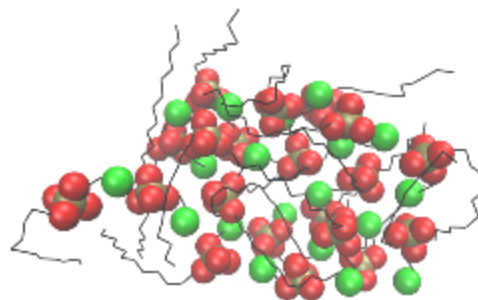



[DPC35] t=0 ns

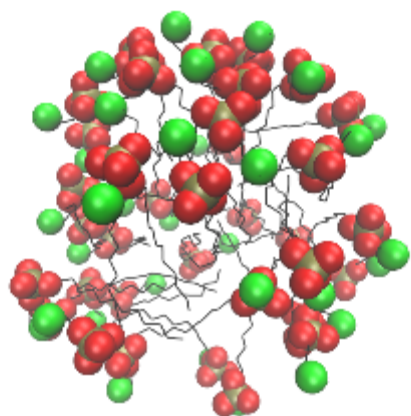

[DPC35] t=50 ns

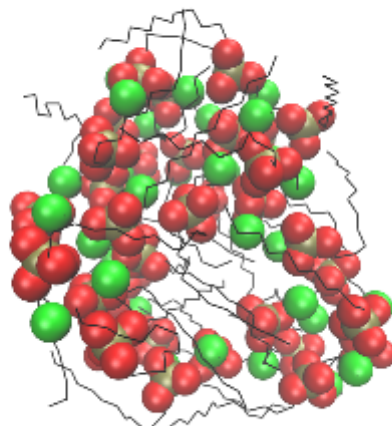

[DPC50] t=0 ns

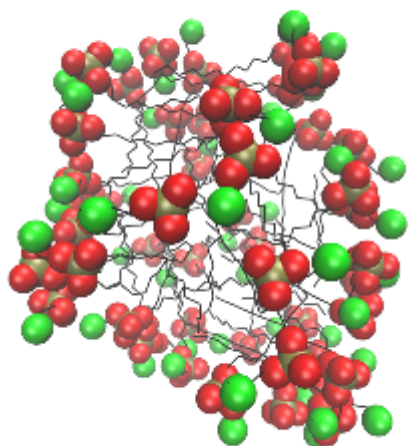

[DPC50] t=50 ns

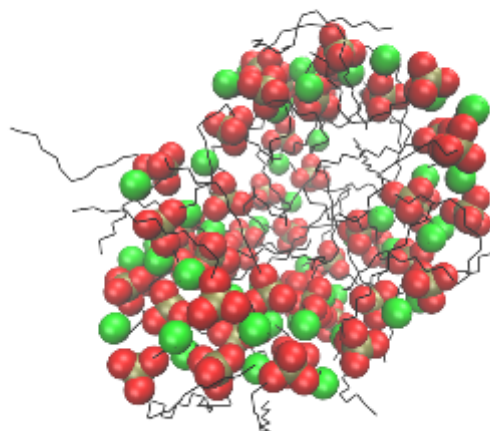

[DPC100] t= 0 ns

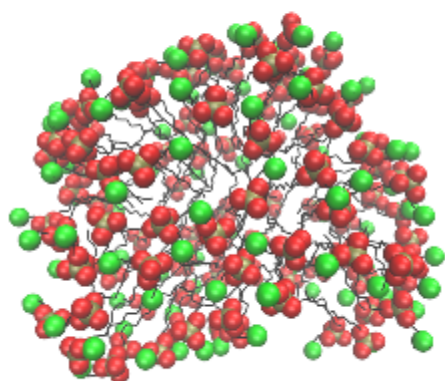

[DPC100] t= 50 ns

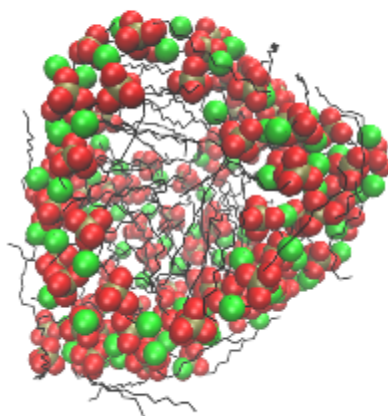

Figure 3-SI Snapshots of surfactant aggregates at the start ( $t=0$ ns), and at the end ( $t=50$ ns) of MD simulations in vacuo. Sodium ions (blue), sulfur (yellow), oxygen (red), phosphor (tan) and nitrogen (green) atoms of the SO<sub>3</sub><sup>-</sup> and PO<sub>4</sub><sup>-</sup> polar heads are displayed in a space-filling mode to evidence their location, whereas alkyl chains are displayed as black lines. Hydrogen atoms are not shown, to avoid crowding.

Table 1-SI Values of widths of the Gaussians whose sommation builds up the bias potentials used in the well-tempered metadynamics simulations for the examined aggregation numbers  $N_{ag}$ ;  $\sigma_t$  and  $\sigma_h$  represent the Gaussian width for the bias applied to the gyration radius  $R_{gh}$  of the pivot atoms of the surfactant head group (S for AOT and SDS, and P for DPC) and to the gyration radius  $R_{gt}$  of the terminal aliphatic carbon atoms, respectively.

| $N_{ag}$ |            | 5     | 10    | 20    | 35    | 50    | 100   |
|----------|------------|-------|-------|-------|-------|-------|-------|
| AOT      | $\sigma_t$ | 0.015 | 0.007 | 0.008 | 0.006 | 0.01  | 0.004 |
|          | $\sigma_h$ | 0.003 | 0.002 | 0.005 | 0.004 | 0.006 | 0.003 |
| SDS      | $\sigma_t$ | 0.03  | 0.02  | 0.01  | 0.008 | 0.015 | 0.006 |
|          | $\sigma_h$ | 0.002 | 0.001 | 0.001 | 0.002 | 0.003 | 0.004 |
| DPC      | $\sigma_t$ | 0.03  | 0.02  | 0.015 | 0.008 | 0.015 | 0.005 |
|          | $\sigma_h$ | 0.002 | 0.003 | 0.004 | 0.002 | 0.003 | 0.002 |

Table 2-SI . Values of aggregate volume ratios  $V_{\text{ext}}/V_{\text{tot}}$  and  $V_{\text{int}}/V_{\text{tot}}$  (see text) for the final configurations of 50 ns of MD simulations in vacuo (MD) and for representative configurations corresponding to the minimum of the free energy surface (min (FES)).

| AOT | MD                              | MD                              | min (FES)                       | min (FES)                       |
|-----|---------------------------------|---------------------------------|---------------------------------|---------------------------------|
| N   | $V_{\text{ext}}/V_{\text{tot}}$ | $V_{\text{int}}/V_{\text{tot}}$ | $V_{\text{ext}}/V_{\text{tot}}$ | $V_{\text{int}}/V_{\text{tot}}$ |
| 5   | 0.91                            | 0.01                            | 0.92                            | 0.01                            |
| 10  | 0.89                            | 0.03                            | 0.89                            | 0.03                            |
| 20  | 0.81                            | 0.12                            | 0.85                            | 0.07                            |
| 35  | 0.77                            | 0.16                            | 0.81                            | 0.11                            |
| 50  | 0.75                            | 0.17                            | 0.77                            | 0.16                            |
| 100 | 0.64                            | 0.28                            | 0.66                            | 0.27                            |

| SDS             | MD                              | MD                              | min (FES)                       | min (FES)                       |
|-----------------|---------------------------------|---------------------------------|---------------------------------|---------------------------------|
| $N_{\text{ag}}$ | $V_{\text{ext}}/V_{\text{tot}}$ | $V_{\text{int}}/V_{\text{tot}}$ | $V_{\text{ext}}/V_{\text{tot}}$ | $V_{\text{int}}/V_{\text{tot}}$ |
| 5               | 0.84                            | 0.04                            | 0.82                            | 0.05                            |
| 10              | 0.83                            | 0.04                            | 0.84                            | 0.04                            |
| 20              | 0.80                            | 0.06                            | 0.83                            | 0.05                            |
| 35              | 0.80                            | 0.07                            | 0.80                            | 0.06                            |
| 50              | 0.77                            | 0.09                            | 0.79                            | 0.07                            |
| 100             | 0.70                            | 0.16                            | 0.69                            | 0.17                            |

| DPC | MD                              | MD                              | min (FES)                       | min (FES)                       |
|-----|---------------------------------|---------------------------------|---------------------------------|---------------------------------|
| N   | $V_{\text{ext}}/V_{\text{tot}}$ | $V_{\text{int}}/V_{\text{tot}}$ | $V_{\text{ext}}/V_{\text{tot}}$ | $V_{\text{int}}/V_{\text{tot}}$ |
| 5   | 0.76                            | 0.10                            | 0.76                            | 0.11                            |
| 10  | 0.72                            | 0.14                            | 0.73                            | 0.13                            |
| 20  | 0.67                            | 0.20                            | 0.71                            | 0.17                            |
| 35  | 0.57                            | 0.29                            | 0.61                            | 0.25                            |
| 50  | 0.50                            | 0.36                            | 0.55                            | 0.30                            |
| 100 | 0.38                            | 0.48                            | 0.40                            | 0.45                            |
